# Supplementary material for: Explaining maternal antenatal attachment by psychological, clinical and sociodemographic factors: a path analysis study
Source: PubMed Central journal article supplement — BMC Pregnancy Childbirth. 2024 Oct 2;24:638. doi: 10.1186/s12884-024-06836-x (PMC11448281; doi:10.1186/s12884-024-06836-x), 2024-10-02
Supplement: 12884_2024_6836_MOESM1_ESM.pdf [file 12884_2024_6836_MOESM1_ESM.pdf]

**Prenatal Attachment and Psychological Organization of Both Men and Women  
During Pregnancy: Relationship with Type of Delivery and with Obstetrical  
Pathology at the II and at the III Gestational Trimesters.**

**Ana Paula Forte Camarneiro (2011)**

**Doctoral Thesis in Clinical Psychology at the Faculty of Psychology, Lisbon University**

**Sociodemographic and Clinical Questionnaire (Female Form)**

(this questionnaire was designed to be applied face-to-face with the participants)

**Name (first name):** \_\_\_\_\_

**Birth date:** \_\_\_/\_\_\_/\_\_\_    **Age:** \_\_\_\_\_    **Marital status:** \_\_\_\_\_

**Address (local site and municipality):** \_\_\_\_\_

**Telephone:** \_\_\_\_\_

**Health institution at the present moment:** \_\_\_\_\_

**Nationality:** \_\_\_\_\_

**Education:** \_\_\_\_\_    **Professional occupation:**

\_\_\_\_\_

**Employment status:**

Employment contract without time-limit

Employment contract with time-limit

Casual jobs

**Sources of income:**

Monthly salary

Biweekly or daily salary

Subsidies or pensions

Liberal professional fees

Personal/family income

**What kind is the place where you live?** \_\_\_\_\_

Apartment

Villa

Old house

Other  Which? \_\_\_\_\_

**Who lives with you at the same house?**

Kinship: \_\_\_\_\_

Age? \_\_\_\_\_

**Living conditions:**

Good  Reasonable  Bad

Is there piped water? Yes  No

And sewers? Yes  No

**Current Pregnancy:**

Gestational Time Today: \_\_\_\_ weeks; Delivery Expected Date: \_\_\_\_/\_\_\_\_/\_\_\_\_

Expected Delivery Place? \_\_\_\_\_

Was it difficult for you to get pregnant? No  Yes

If Yes, have you consulted any expert on the matter? Yes  No

How long did it took for you to get pregnant?

< 6 months  between 6 months and 1 year  between 1 and 2 years  > 2 years

How much weight gain have you got during your current pregnancy? \_\_\_\_\_ Kg

Is there any health condition associated with this pregnancy? Yes  No

If Yes, Which One(Ones)? \_\_\_\_\_

Are you smoking during the current pregnancy? No  Yes

If Yes, how many cigarettes a day? \_\_\_\_\_

Do you consume alcoholic beverages during the current pregnancy? No  Yes

Regularly  Occasionally  Never

Did you plan this pregnancy? Yes  No

If Not, Did you accepted it easily

You accepted it with difficulty

You didn't accepted it yet

And your husband / partner?

He accepted it easily

He accepted it with difficulty

He hasn't accepted it yet

Are there any reasons for you to think this pregnancy is happening at the wrong time?

No  Yes

If Yes, those reasons have to do with:

Health Conditions

Finances

Marriage

Professional Issues

Other Sons

Parents

Lack of Space

Clashes with other projects

Other questions

**Gynecological History:**

How old were you at your first period? \_\_\_\_\_ (years)

Usual number of days between periods? \_\_\_\_\_

When you are having a period, do you feel:

Comfortable

Indifferent

Uncomfortable but without pain

Uncomfortable and with pain

Were you married or lived with someone before the present marital relationship?

No  Yes

If Yes, did you get pregnant during that relationship? No  Yes

If Yes, how many pregnancies? \_\_\_\_\_ Aborted \_\_\_\_\_ Complete \_\_\_\_\_

**Obstetrical history:**

Total number of pregnancies before this one? \_\_\_\_\_

Were there any aborted pregnancies No  Yes  If Yes, how many? \_\_\_\_\_

These aborted pregnancies were:

Voluntary  How many? \_\_\_\_\_

At which age of yours? \_\_\_\_\_ At which gestational ages? \_\_\_\_\_ (weeks)

Due to medical suggestion  How many? \_\_\_\_\_

At which age of yours? \_\_\_\_\_ At which gestational ages? \_\_\_\_\_ (weeks)

Spontaneous interruption?  How many? \_\_\_\_\_

At which age of yours? \_\_\_\_\_ At which gestational ages? \_\_\_\_\_ (weeks)

How many times have you given birth? \_\_\_\_\_

At which age of yours in each birth? \_\_\_\_\_

Gestational age for each baby that you gave birth? \_\_\_\_\_

How many sons do you have at the present moment? \_\_\_\_\_

Were there any diseases during your past pregnancies? No  Yes

If Yes, which diseases? \_\_\_\_\_

Did you stay in hospital during your previous pregnancies? No  Yes

If Yes, which was the reason for that? \_\_\_\_\_

How many pregnancies did you had with your present husband / companion? \_\_\_\_\_

Relevant data during your previous pregnancies: \_\_\_\_\_

Relevant health problems before the current pregnancy: \_\_\_\_\_

**Husband / Companion:**

Name: \_\_\_\_\_ Age \_\_\_\_\_ (years)

---
